# Supplementary material
Source: publisher figshare collection journal article supplement (https://karger.figshare.com/ndownloader/files/27958830)
Supplement: Supplementary file 1 [file 27958830]

**Supplementary Table 1: Search strategy**

| **PubMed/MEDLINE** | **Sciencedirect/Scopus** | **Embase** | **Google scholar** |
| --- | --- | --- | --- |
| "beers criteria"[All Fields] AND "potential inappropriate medication"[All Fields] AND "ethiopia"[All Fields] AND "stopp 2 criteria"[All Fields] AND "stopp criteria"[All Fields]  potentially inappropriate medication list"[All Fields]  inappropriate medication, Beers, STOPP, inappropriate, medication,  drug, use, prescribing, and elderlyTS=("Potentially Inappropriate Medication List" OR “PIM List*” OR “Inappropriate  Medication*” OR “Inappropriate Medicine*” OR “Inappropriate Prescrib*” OR  “Inappropriate Prescription*” OR “Inappropriate Drug*” OR “Suboptimal Medication*”  OR “Suboptimal Medicine” OR “Suboptimal Medicines” OR “Suboptimal Prescrib*” OR  “Suboptimal Prescription*” OR “Suboptimal Drug Use” OR “Suboptimal Drugs” OR  “Incorrect Medication*” OR “Incorrect Prescribing” OR “Incorrect Prescription*” OR  “Incorrect Drug*” OR “potentially inappropriate prescrib*”.  ethiopia AND 'inappropriate prescribing' | “potentially  inappropriate prescription*” OR “potentially inappropriate medication*” OR “potentially  inappropriate medicine*” OR “potentially inappropriate drug*” OR “Beers Criteria” OR  STOPP OR “Screening Tool of Older Person's Potentially Inappropriate Prescriptions” OR  “PIM”)  TS=("Polypharmacy" OR "Polymedication*" OR "Polymedicine" OR "Polyprescription*"  OR "Polydrug*" OR "Multiple Prescription*" OR "Multiple Prescrib*" OR "Multiple  Medication*" OR "Multiple Medicine" OR "Multiple Medicines" OR "Multiple Drug*" OR  "Multiple Drug Use" OR "Geriatric assessment" OR "Geriatric assessments" OR "Geriatric  review" OR "Geriatric reviews") ethiopia AND 'inappropriate prescribing' | 'potential inappropriate medication' OR (('potential'/exp OR potential) AND inappropriate AND ('medication'/exp OR medication)) 'beers criteria'/exp OR 'beers criteria' 'inappropriate prescribing'/exp OR 'inappropriate prescribing' 'polypharmacy'/exp OR polypharmacy  'stopp criteria'/exp OR 'stopp criteria'  'older adults' AND 'inappropriate prescribing' ethiopia AND 'inappropriate prescribing' | potentially inappropriate medication OR prescribing OR Beers, STOPP, inappropriate, medication OR drug use“Beers Criteria” OR  STOPP OR “Screening Tool of Older Person's Potentially Inappropriate Prescriptions” OR  “PIM”) Polypharmacy" OR "Polymedication*" OR "Polymedicine" OR "Polyprescription*"  OR "Polydrug*" OR "Multiple Prescription*"  ethiopia AND 'inappropriate prescribing' |
